# Supplementary material for: Investment needs to achieve SDGs: An overview
Source: PLOS journal article supplement (doi:10.1371/journal.pstr.0000020), 2022-07-11
Supplement: S1 (10.1371/journal.pstr.0000020.s001) [file journal.pstr.0000020.s001]

## Sheet: Table A. Overview
	HEALTH			FOOD			HEALTH					EDUCATION				WATER & SANITATION							ENERGY ACCESS & LOW-CARBON POWER INFRASTRUCTURE							TRANSPORT INFRASTRUCTURE				TELECOMMUNICATIONS INFRASTRUCTURE	CLIMATE ACTION (MITIGATION)		CLIMATE ACTION (ADAPTATION)	BIODIVERSITY CONSERVATION
Study	UNCTAD World Investment Report 2014 (as summarized in UNCTAD SDG investment trends monitor 2019)	Stenberg et al/ WHO (2019)	Stenberg et al/ WHO (2017)	Ending hunger by 2030–policy actions and costs. UN Food Systems Summit Brief prepared by Research Partners of the Scientific Group for the Food Systems Summit	Ceres2030: Sustainable solutions to end hunger - Summary Report	IFPRI, Ceres2030: Ending hunger, increasing incomes, and protecting the climate: What would it cost donors?	Energy investment needs for fulfilling the paris agreement and achieving the sustainable development goals.	Financing transformative health systems towards achievement of the health Sustainable Development Goals: a model for projected resource needs in 67 low-income and middle-income countries.	Guide posts for investment in primary health care and projected resource needs in 67 low-income and middle-income countries: a modelling study.	Investing in non-communicable diseases: an estimation of the return on investment for prevention and treatment services.	IFPRI 2016. Meeting the need: Financing to attain targets. In Global Nutrition Report 2016: From Promise to Impact: Ending Malnutrition by 2030. Chapter 7.	Energy investment needs for fulfilling the paris agreement and achieving the sustainable development goals.	UNESCO Global education monitoring report 2020: inclusion and education: all means all (GEM 2020)	UNESCO: Act now: reduce the impact of COVID-19 on the cost of achieving SDG 4 (1)	UNESCO: Act now: reduce the impact of COVID-19 on the cost of achieving SDG 4 (2)	The Costs of Meeting the 2030 Sustainable Development Goal Targets on Drinking Water, Sanitation, and Hygiene (1)	The Costs of Meeting the 2030 Sustainable Development Goal Targets on Drinking Water, Sanitation, and Hygiene (2)	Water and Cities: Ensuring Sustainable Futures. In OECD Studies on Water.(as reported in Ajami et al., 2018)	Main report Progress on Drinking Water , Sanitation and Hygiene. (as reported in Ajami et al., 2018)	Balancing clean water-climate change mitigation trade-offs.	Energy investment needs for fulfilling the paris agreement and achieving the sustainable development goals.	Achieving Abundance: Understanding the Cost of a Sustainable Water Future	The role of decentralized systems in providing universal electricity access in Sub-Saharan Africa–A model-based approach.	Towards universal electricity access in Sub-Saharan Africa: A quantitative analysis of technology and investment requirements.	Towards Universal Access to Clean Cooking Solutions in Sub-Saharan Africa.	Africa Energy Outlook 2019	State of electricity access report 2017	Beyond the Gap: How Countries Can Afford the Infrastructure They Need while Protecting the Planet. Julie Rozenberg, Marianne Fay, 2019	Energy investment needs for fulfilling the paris agreement and achieving the sustainable development goals.	Beyond the Gap: How Countries Can Afford the Infrastructure They Need while Protecting the Planet. Julie Rozenberg, Marianne Fay, 2019	Global land transport infrastructure requirements: estimating road and railway infrastructure capacity and costs to 2050.U5, as presented in Fischer-Romito and Guivarch, 2019	Transportation Infrastructures in a Low Carbon World: An Evaluation of Investment Needs and Their Determinants.	OECD (2017), Investing in Climate, Investing in Growth, as presented in Fischer-Romito and Guivarch, 2019	OECD (2017), Investing in Climate, Investing in Growth, as presented in Fischer-Romito and Guivarch, 2019	Energy investment needs for fulfilling the paris agreement and achieving the sustainable development goals.	Energy system developments and investments in the decisive decade for the Paris Agreement goals	Economy-wide effects of coastal flooding due to sea level rise: A multi-model simultaneous treatment of mitigation, adaptation, and residual impacts	A review of evidence for area-based conservation targets for the post-2020 global biodiversity framework
Short reference				(von Braun et al., 2021)	(Debucquet et al., 2020)		(McCollum et al., 2018)	(Stenberg et al., 2017)	(Stenberg et al., 2019)	(Bertram et al., 2018)		(McCollum et al., 2018)	(UNESCO, 2020)	(UNESCO, 2020)	(UNESCO, 2020)	(Hutton & Varughese, 2016)	(Hutton & Varughese, 2016)	(OECD, 2015)	(WHO & UNICEF, 2017)	(Parkinson et al., 2019)	(McCollum et al., 2018)	(Strong et al., 2020)	(Dagnachew et al., 2017)	(Lucas et al., 2017)	(Hof et al., 2018)	(IEA, 2019)	(World Bank Group, 2017)	(Rozenberg & Fay, 2019)	(McCollum et al., 2018)	(Rozenberg & Fay, 2019)	(Dulac, 2013)	(Fisch-Romito & Guivarch, 2019)	(OECD, 2017)	(OECD, 2017)	(McCollum et al., 2018)	Bertram et al. (2021)	Schinko et al. (2020)	Waldron et al. (2020)
Expenditure Coverage		Coverage: Primary health care (PHC) as a major contributor to Universal Health Coverage (UHC) in most high-mortality LICs and LMICs (67)	Universal Healthcare (UHC) coverage & comprehensice health services delivery towards SDG3 attainment in 67 LICs, LMICs	expanded new social protection programs, crop protection, integrated soil fertility management, the AfCTA, fertilizer-use efficiency, and child nutrition programs	"for example, toward farmers’ alliances, enabling smallholders to work together and providing training for young people; the cultivation of climate-resilient crops; and appropriate irrigation, storage and processing of crops"		investments required fortechnologies to limit harmful air pollutants from emissions & slow down resulting premature deaths globally	Universal Healthcare (UHC) coverage & comprehensice health services delivery towards SDG3 attainment in 67 LICs, LMICs	Primary health care (PHC) as a major contributor to Universal Health Coverage (UHC) in most high-mortality LICs and LMICs (67)	Non-communicable diseases (NCDs), particularly cardio-vascular diseases in "20 countries with highest NCD burden" between 2015 & 2030. Uses cost-benefits approach to investing in cardiovascular disease prevention using effective, low-cost interventions			2015 model: 39 billion annual gap (2015-2030)	Updated data and assumptions from prevoius estimate 2020 model (no-COVID): 148 billion annual gap (2020-2030) Simply quoted (page 310, 314) without reference or explanation of methods	cumulative need before COVID: 5 trillion between 2015 and 2030, or 504 billion in 2020-2030 period, from 340 billion in 2015-2030 period pre-COVID domestic finance baseline 356 billion financing gap: 2015 model: 39 billion annual gap (2015-2030) 2020 model (no-COVID): 148 billion annual gap (2020-2030) 2020 model (with COVID): no COVID + 32.5 to 44.5 billion = 180 to 193 billion Simply quoted (pa…	Gaps: treats overextension of water resources and climate change as unknowns	Gaps: treats overextension of water resources and climate change as unknowns			Capital and operational costs of infrastructure for freshwater withdrawal and distribution, wastewater collection and recycling, desalination	Expenditures for water-related technologies and infrastructures to achieve the targets.	Investment needs for all SDG 6 targets globally, beyond WASH, viz. Industrial & agricultural water pollution control, water scarcity, and integrated water resource management. A simple unit cost approach is used	Coverage: Universal access to electricity in urban and rural areas of Sub-Saharan Africa in a baseline and 5 scenarios of increasing ambition levels (demand). Estimates LCOE of capital investments in installed capacity, transmission & distribution networks, using a mix of central grid-expansion, mini-grids, and standalone options		Purchasing costs of cookstoves and fuels (kerosene, LPG, natural gas, biogas, electricity) for households in sub-Saharan Africa under different policy and target scenarios			Cross- SDG infra spending needs for LMICs, viz electricity, transport, WASH, flood protection, and irrigation. Invetment needs presented under three scenarios based on ambition and efficiency, with the preferred scenario aligning with efficiient investment choices and outcomes meeting the SDGs	Subsidies for clean cookstoves, price support for modern fuels	Cross- SDG infra spending needs for LMICs, viz electricity, transport, WASH, flood protection, and irrigation. Invetment needs presented under three scenarios based on ambition and efficiency, with the preferred scenario aligning with efficiient investment choices and outcomes meeting the SDGs		Passenger and freight transport infrastructure modes (road, rail, BRT, high speed rail, air and maritime) in low carbon and high carbon scenario pathways using global IAM Imaclim-R. Except sea and air freight due to lack of data - significant	Road, rail, airports, ports			Investments into non-fossil energy supply technologies	investments to building dykes or sea-walls adapting to sea-level rise as a result of un-mitigated or residual climate impacts	Investments for expanding protected areas such as national parks and marine parks to 30% each of global of land and water surfaces, and towards existing protected areas
Clear identification of inputs to address overlaps/gaps with other sectors (if explicit)		Yes	Yes	Yes (MACC approach) - Education, gender, infrastructure (communication, rail, road), rural energy access, mechanization of farm operations (i.e. increased energy demand), social protection programmes, Free trade agreements.	Yes (CGE approach) - social protection programmes, rural infrastructure, payments for ecosystem services		no	Yes	Yes			no										no	no						no			Yes	no	no	no	no	no	no
Methodology	Unspecified	Intervention-based needs assessment. 3 (categories of) measures: public health interventions & outpatient care, general inpatient care, and cross sectoral investment (air quality, hyegine, sanitation, but also diagnostic tests, orthopedic devices, program support costs)	Intervention-based needs assessment. Bottom-up, inputs based costing approach (quantities times price). Projection of population level & individual level health services coverage scale up dynamically over time (accounting for population increase, reduced mortality etc), using four delivery platforms and two scenarios of differing ambition levels (nationally constrained, ambitious/ full)	Intervention-based needs assessment MAC curves approach for least cost interventions (22 interventions used). Maps incremental population out of hunger with the increasing per capita order of intervention measures. - Intervention measures have broad coverage, but synergies/ trade-offs with other goals not considered. - Effect of order (path dependency) and differentiated locus of interventions no…	CGE CGE model estimating additional investment (spending) needed by allocating to portfolio of public policy internevtions. Data from international to household level for high resolution of impact assessment.	CGE	IAM postprocessing. Investments towards air pollution control technologies using GAINS model	Unit costs Bottom-up, inputs based costing approach (quantities times price). Projection of population level & individual level health services coverage scale up dynamically over time (accounting for population increase, reduced mortality etc), using four delivery platforms and two scenarios of differing ambition levels (nationally constrained, ambitious/ full)	Intervention-based needs assessment. 3 (categories of) measures: public health interventions & outpatient care, general inpatient care, and cross sectoral investment (air quality, hyegine, sanitation, but also diagnostic tests, orthopedic devices, program support costs)	Unit costs Uses inter-UN agency OneHealth Tool, which multiplies needs based quantities of interventions by country-specific unit delivery prices, to dynamically estimate total costs over population, mortality and disease incedence projections over time	??	IAM postprocessing (unit costs).	Unspecified	Intervention-based needs assessment. Updates model data and assumptions used for previous estimate in 2015. Increased costs attributed to slower progress than expected, updated GDP values since 2015, more students than projected, increased classroom construction costs, low pupil/teacher ratios.	Intervention-based needs assessment.	Unit costs A quantitative cost model was run at the country level for 140 low- and middle-income countries.20 The results were then aggregated to yield the regional and global totals or averages, weighted by country population size. The model also generated separate estimates for rural and urban areas,21 as well as by wealth quintile	Unit costs A quantitative cost model was run at the country level for 140 low- and middle-income countries.20 The results were then aggregated to yield the regional and global totals or averages, weighted by country population size. The model also generated separate estimates for rural and urban areas,21 as well as by wealth quintile	Unspecified	Unspecified	IAM	IAM	Unit cost	IAM	IAM	IAM	Unspecified (possibly partial equilibrium modeling, as in 2011)	Unspecified (World Bank's Access Investment Model, method not public)	IAM, details unknown	IAM	IAM, details unknown		IAM + GSA for uncertainty on factors influencing investment needs IAM Imaclim-R has hybrid of recursive dynamic CGE and bottom up sectoral modules ""The method used to compute investment needs proceeds in four steps: (1) compute mode share scenarios if they are not explicit, or not at the required disaggregation level, in input scenarios; (2) calibrate existing transportation infrastructure; (3) …			IAM	IAM, unit costs ex post	multi-model; stylized dynamic-recursive economic growth modelling to perform CBA	Intervention based. Cost data of increasing protected areas captured at national levels. A baseline scenario with no expansion, and six scenarios with differing locations of the targeted 30% expansion are developed.
Peer-reviewed or grey				Grey	Grey		Peer-reviewed	Peer-reviewed	Peer-reviewed	Peer-reviewed		Peer-reviewed	Grey	Grey	Grey	Grey	Grey	Grey		Peer-reviewed	Peer-reviewed	Grey	Peer-reviewed	Grey	Grey	Grey	Grey	Grey	Peer-reviewed	Grey	Peer-reviewed	Peer-reviewed	Grey	Grey	Peer-reviewed	Peer-reviewed	Peer-reviewed	Peer-reviewed
Types of expenditure considered (capex/ opex etc. where explicit)	capex only Infrastructure (including hospitals and health care centers), R&D for medicines and vaccines	Incremental (to a "status quo" spending scenario, assuming constant coverage of interventions over time). Capex + Opex			Capex+ opex	"Social protection, financial capital, rural infrastructure, and extension services"	Capex+ opex		Capex + Opex			unclear		Capex + Opex		CapEx and OpEx (including maintenance) covered	CapEx and OpEx (including maintenance) covered	CapEx and OpEx (including maintenance) covered				capex+opex to scale up simple unit cost estimates to meet projected gap	Capital costs only, for LCOE of universal access to electricity via mix of centralized grid, mini-grids, and stand-alone sources		capital costs of stovetops + cost of purchasing associated modern fuels			Capex + Opex	capex (policy costs)	Cross- SDG infra spending needs for LMICs, viz electricity, transport, WASH, flood protection, and irrigation. Invetment needs presented under three scenarios based on ambition and efficiency, with the preferred scenario aligning with efficiient investment choices and outcomes meeting the SDGs		Capex + Opex, including projections of utilization rates and maintenance Total investments, not incremental to baseline (but may be derived from presented SSP2-based needs scenario)	Capex		Capex + opex	Unspecified (only capex implied)	Capex + opex
Geographic scope and disaggregation		Country level (67 LICs, LMICs). [1]	Country level (67 LICs, LMICs). [1]	LICs, LMICs	LICs, LMICs	LICs, LMICs	Global	67 LICs & LMICs	67 LICs & LMICs	Country level (20 countries with highest NCD burden)		Global	Global	LICs, LMICs	LICs, LMICs	Global (140, evaluated on country level and aggregated in regions / global level)	Global (140, evaluated on country level and aggregated in regions / global level)	OECD cities		Global	Global	Global	Sub Saharan Africa	Sub Saharan Africa	Sub Saharan Africa	Sub Saharan Africa	Global	LMICs	Global	LMICs	Global	Global. 5 world regions: OECD, ASIA, MEA, CIS (commonwealth), LAM			Global	Global	Global, focus on G20 countries	Global
Consideration of climate change mitigation and adaptation (if explicit)		No [n/a]	n/a		Yes (claimed)		Yes (costs of meeting target with and without energy system transformation to meet Paris targets)	No	No	No		no		No						Scenario looking at achieving both SDG6 and mitigation to stay below 1.5C		no	no		yes			Yes	yes, fuel (energy) prices in Paris scenario	Yes		Yes
Consideration of economy-wide effects (if explicit)			country-specific prices used, GDP projections and assumptions on govt revenues and healh priorities	No	Yes (claimed)		not explicit, calculations via postprocessing	country-specific prices used, GDP projections and assumptions on govt revenues and healh priorities				not explicit, calculations via postprocessing										no	no		no			Partial. Cross sectoral effects on sectors considered for infra needs. Other economic variables like GDP are largely scenario drivers	no	Partial. Cross sectoral effects on sectors considered for infra needs. Other economic variables like GDP are largely scenario drivers		Sectoral parameters used as scenario drivers and not as dependent variables			no	no	No for two of the models used, some stylized sectoral effects considered in third.	partial, claimed
Relationship to SDGs (direct impact on specific targets/ Goals)	SDG 3, 2.1 (malnutrition), 6.1 (drinking water access), 7.1 (energy services access), interlinkages with SDG 1, 4, 5, 8, 16	3.8 (partial): UHC contributes to 3.1: maternal mortality, 3.2: under-5 deaths, possibly 3.3: non-communicable dieases - all via general inpatient & outpatient PHC	3.1, 3.2, 3.3 (communicable diseases): partial, 3.4 (NCD): partial, 3.5 (substance): partial, 3.7 (sexual & reproductive health services): partial 3.8: UHC other SDG tagets with health as primary intent (SDG 2, 6, 7) soft-links to SDG 4 (education), SDG 5 (gender equality)	2.1, 2.2	2.1, 2.2, 2.4		3.9	3.1, 3.2, 3.3, 3.4, 3.5, 3.7, 3.8	3.1, 3.2, 3.3, 3.8 - all via general inpatient & outpatient primary healthcare services	3.4		4.1	4	4	4	6.1, 6.2	6.1, 6.2, 6.3	6.5	6.1: 6.2:	6.1, 6.2, 6.3, 6.6	6.1, 6.2, 6.3, 6.4	6.1, 6.2, 6.3, 6.4, 6.5, 6.6	7.1	7.1, 7.2	7.1	7.1, 7.2	7.1	7.1	7.1, 7.2, 7.3	9.1	9.1	9.1	9.1	9.1	13	13	13	14, 15
Period covered	2015 - 2030	2020 – 2030	2016 - 2030	2020 - 2030	2020 - 2030		2016-2030	2016 - 2030	2020 – 2030	2015 - 2030		2016-2030	2015 - 2030	2020-2030	2020-2030	2015-2030	2015-2030	2015-2030 (best guess)	2015-2030 (best guess)		2016-2030	2015-2030	2010-2030	2010-2030	2016-2030	2019-2040	unspecified	2015 - 2030	2016-2030	2015 - 2030		2015 - 2050, 2015 - 2080			2016-2030	2020-2030 (also 2020-2050 separately)	2020-2050 (and 2100)	2020-2030
Base year	2013 (best guess)	2014	2014	2018	2016 (best guess)	2018	2015	2014	2014	2015		2015	2019 (assumed year before publication)	2019 (assumed year before publication)	2019 (assumed year before publication)	2015	2015	2015 ( best guess)	2015 ( best guess)	2010	2015	2015	2005	2005	2005	2018	2016 (assumed year before publication)	2015	2015	2015		2019 (assumed)	2015	2015	2015	??	2014	2015
Baseline investment [in case of incremental final value] (USD)				Yes. Baseline = current LIC/ LMIC annual spending, USD 12 billion per year	Yes. Baseline = current ODA (avg.)		Yes. Baseline scenario based on SSP2-Cpol	Yes. Baseline = current (2014) spending	Yes. "Status quo" spending scenario, assuming constant coverage of interventions over time.	Yes.		Yes. Baseline scenario based on SSP2-Cpol	Yes. USD 465 billion per year (assumed domestic financing as % GDP)	Yes. USD 356 billion per year (assumed domestic financing as % GDP)	Yes.	Yes. "Current spending"	Yes. "Current spending"	Unclear		Yes.	Yes. Baseline scenario based on SSP2-Cpol	Yes.	Yes. USD 310 billion cumulative, or 16 billion per year	Yes. USD 310 billion cumulative, or 16 billion per year (15-19 billion)	Yes. USD 1.6 billion per year (2016-2030)	Yes. Baseline = current power sector investment implied to be about USD 20 billion in SSA	No. USD 50 billion is the cumulative annual need, i.e. not additional to baseline. (However, mentions IEA 2011 published baseline as then current actual investment flows (so ODA?) of 9 billion.)	No	Yes. Baseline scenario based on SSP2-Cpol	No	No	Total. Scenarios used refer to carbon/ emission scenarios.	No	No	Yes. Baseline scenario based on SSP2-Cpol. Total investments (supply + demand) Cpol: 2481 (1885-3014) 1.5C: 3381 (2366-4094) Additional nvestment needs = (1.5C - Cpol)	Yes. Average recent investments (2015-2019) considered as baseline	No	Yes, USD 24.5 billion per year. Baseline scenario based on current expenditures and no expansion of protected areas.
Period average in billions per year (USD)	USD 140 billion	USD 200 - 238 per year + USD 32 per capita across all (67) countries	USD 371 billion per year mean USD 271 (range 74 - 984) per person per year Quotes Schmidt-Traub USD 69 - 89 billion. Around 75% of additional costs are for health systems, with health workforce and infrastructure (including medical equipment) as the main cost drivers.	Additional to LIC, LMIC current spending, USD 11 - 14 billion per year by G7 countries for lifting 500 million people out of hunger & malnutrition. Ending hunger: Additional to current LIC, LMIC spending, USD 39 - 50 billion between 2020 & 2030, including COVID-19 impacts	USD 33 billion additional 14 billion ODA by OECD countries + additional 19 billion by L- & LMICs domestically	USD 33 billion p.a. 2020-2030 (14 billion additional ODA + 19 billion additional rax-based public funding in LICsLMICs - over 12 billion present "baseline" ODA, and unspecified baseline national spending)	USD 620 billion	371 billion	USD 200 - 328 billion in LMICs	USD 120 billion total between 2015 & 2030 i.e. additional USD 1 - 50 per capita per year	Estimates present, but unclear compatibility with SDG scope	USD 180 billion	USD 39 billion per year between 2015-2030 in LICs, LMICs	USD 148 billion per year (attributed to updated model assumptions & data)	USD 178 - 193 billion per year (additional costs due to COVID impacts)	USD 28.4 USD 13.8 - 46.7 For basic WASH	$114 (2015-2030) USD 77 - 166 For safely managed WASH	Infrastructure: In total: US$6.7 trillion by 2030 and US$22.6 trillion by 2050 For 2015-2030: $447 billion per year. Unclear if incremental to baseline or not	In total: US$1.7 trillion by 2030, so ~113 billion per year	$380 - 560 billion Above baseline to achieve both SDG6 and 1.5C climate change.	USD 820 billion (with energy transformation)		USD2005 39 billion per year incremental to baseline USD 1100 billion (2010-2030), or USD 55 billion per year for universal access to electricity at baseline consumption levels USD 22 -2500 bilion (2010-2030) for UA in low to high consumption scenarios	USD 9 - 33 billion per year incremental to baseline USD 480-970 billion cumulative (2010-2030), or USD 24 - 49 billion per year including baseline spend	$1.6 (2016 - 2030) Capital costs only, fuel expenditure is included per household but no total specified Fuel costs USD 30 billion per year	USD 82.3 billion = USD 102.3 billion - USD 20 billion baseline Africa Case: 102.3 total (83.1 on-grid and 19.3 mini-grid and stand-alone)	USD 50 billion (full 24x7 grid power) USD 1.5 billion (a few light bulbs and mobile phone)	SDG 7 (Electricity): 780 capex + 210 opex = 990/15 = 66 *Costs discounted at 6%	USD 125-325 billion (225) with energy system transformation	SDG 9 (Transport): 420 capex + 460 opex = 880/15 years = 59 *Costs discounted at 6%	USD 1.8 trillion	USD 1 - 4 trillion	USD 2.7 trillion	USD 0.6 trillion	USD2015 900 (481-1633) billion	USD 0.3-3 trillion	USD 158 - 161 trillion	USD 78.5 billion to 153.5 billion per year (USD 103 -178 billion per year including baseline)
Period average in USD2019 per year over specified period (incremental to assumed baseline unless otherwise specified)	USD 154 billion	USD 216 - 257 in 2019 $ per year	USD 400 in 2019$ per year	USD 40 - 60 bilion	USD 35 billion	USD 34 billion per year	USD 669 billion	USD 400 billion	USD 216 - 254 billion	USD 129 billoin		USD 194 billion	USD 39 billion		USD 178-193 billion	USD 14 - 50 billion (calculated mean USD 30.6 billion)	USD 83 - 179 billion (calculated mean USD 123 billion)	USD 482 billion	USD 121.9 billion	USD 445 - 657 billion	USD 884 billion	USD 1.12 trillion	USD 51 billion	USD 11 - 43 billion	USD 54 billion	USD 84 billion	USD 51 billion	USD 71 billion	USD 135 - 350 billion	USD 63 billion	USD 2 trillion	USD 1 - 4 trillion	USD 2.9 trillion	USD 647 billion	USD 971 billion (519 - 1761 billion)	USD 0.3-3 trillion	USD 158 - 161 trillion	USD 65 - 166 billion
APA		Stenberg, K., Hanssen, O., Bertram, M., Brindley, C., Meshreky, A., Barkley, S., & Edejer, T. T. T. (2019). Guide posts for investment in primary health care and projected resource needs in 67 low-income and middle-income countries: a modelling study. The Lancet Global health, 7(11), e1500-e1510.	Stenberg, K., Hanssen, O., Edejer, T. T. T., Bertram, M., Brindley, C., Meshreky, A., ... & Soucat, A. (2017). Financing transformative health systems towards achievement of the health Sustainable Development Goals: a model for projected resource needs in 67 low-income and middle-income countries. The Lancet Global Health, 5(9), e875-e887.	Von Braun, J., Bezawit Beyene, C., Torero Cullent, M., Laborde, D., & Smaller, C. (2020). Ending hunger by 2030–policy actions and costs. Bonn: Center for Development Research.	Debucquet, D., Porciello, J., & Smaller, C. (2020). Ceres2030: Sustainable Solutions to End Hunger Summary Report.	Laborde, D., Parent, M., & Smaller, C. (2020). Ending Hunger, Increasing Incomes, and Protecting the Climate: What would it cost donors?.	McCollum, David L., Zhou, Wenji, Bertram, Christoph, de Boer, Harmen-Sytze, Bosetti, Valentina, Busch, Sebastian, Després, Jacques, et al., 2018. Energy investment needs for fulfilling the paris agreement and achieving the sustainable development goals. Nat. Energy 7, 589–599.	Stenberg, K., Hanssen, O., Edejer, T. T. T., Bertram, M., Brindley, C., Meshreky, A., ... & Soucat, A. (2017). Financing transformative health systems towards achievement of the health Sustainable Development Goals: a model for projected resource needs in 67 low-income and middle-income countries. The Lancet Global Health, 5(9), e875-e887.	Stenberg, K., Hanssen, O., Bertram, M., Brindley, C., Meshreky, A., Barkley, S., & Edejer, T. T. T. (2019). Guide posts for investment in primary health care and projected resource needs in 67 low-income and middle-income countries: a modelling study. The Lancet Global health, 7(11), e1500-e1510.	Bertram, M. Y., Sweeny, K., Lauer, J. A., Chisholm, D., Sheehan, P., Rasmussen, B., ... & Deane, S. (2018). Investing in non-communicable diseases: an estimation of the return on investment for prevention and treatment services. The Lancet, 391(10134), 2071-2078.		McCollum, David L., Zhou, Wenji, Bertram, Christoph, de Boer, Harmen-Sytze, Bosetti, Valentina, Busch, Sebastian, Després, Jacques, et al., 2018. Energy investment needs for fulfilling the paris agreement and achieving the sustainable development goals. Nat. Energy 7, 589–599.	United Nations Educational, Scientific and Cultural Organization (UNESCO). (2020). Global education monitoring report 2020: inclusion and education: all means all.	United Nations Educational, Scientific and Cultural Organization (UNESCO). (2020). Act now: reduce the impact of COVID-19 on the cost of achieving SDG 4	United Nations Educational, Scientific and Cultural Organization (UNESCO). (2020). Act now: reduce the impact of COVID-19 on the cost of achieving SDG 4	Hutton, G., & Varughese, M. (2016). The Costs of Making the 2030 Sustainable Development Goal Targets on Drinking Water, Sanitation, and Hygiene. Water and Sanitation Program [WSP].	Hutton, G., & Varughese, M. (2016). The Costs of Making the 2030 Sustainable Development Goal Targets on Drinking Water, Sanitation, and Hygiene. Water and Sanitation Program [WSP].	`	`	Parkinson, S., Krey, V., Huppmann, D., Kahil, T., McCollum, D., Fricko, O., Byers, E., Gidden, M. J., Mayor, B., Khan, Z., Raptis, C., Rao, N. D., Johnson, N., Wada, Y., Djilali, N., & Riahi, K. (2019). Balancing clean water-climate change mitigation trade-offs. Environmental Research Letters, 14(1). https://doi.org/10.1088/1748-9326/aaf2a3	McCollum, David L., Zhou, Wenji, Bertram, Christoph, de Boer, Harmen-Sytze, Bosetti, Valentina, Busch, Sebastian, Després, Jacques, et al., 2018. Energy investment needs for fulfilling the paris agreement and achieving the sustainable development goals. Nat. Energy 7, 589–599.	Strong, C., S. Kuzma, S. Vionnet, and P. Reig. 2020. “Achieving Abundance: Understanding the Cost of a Sustainable Water Future.” Working Paper. Washington, DC: World Resources Institute. Available online at www.wri.org/ publication/achieving-abundance.	Dagnachew, A. G., Lucas, P. L., Hof, A. F., Gernaat, D. E., de Boer, H. S., & van Vuuren, D. P. (2017). The role of decentralized systems in providing universal electricity access in Sub-Saharan Africa–A model-based approach. Energy, 139, 184-195.	Lucas, P. L., Dagnachew, A. G., & Hof, A. F. (2017). Towards universal electricity access in Sub-Saharan Africa: A quantitative analysis of technology and investment requirements. PBL Netherlands Environmental Assessment Agency, The Hague.	Dagnachew, A. G., Hof, A. F., Lucas, P., & van Vuuren, D. P. (2019). Towards Universal Access to Clean Cooking Solutions in Sub-Saharan Africa. PBL Netherlands Environmental Assessment Agency.	IEA (2019), Africa Energy Outlook 2019, IEA, Paris https://www.iea.org/reports/africa-energy-outlook-2019	State of electricity access report 2017 (Vol. 2) : full report (English). Washington, D.C. : World Bank Group. http://documents.worldbank.org/curated/en/364571494517675149/full-report	Rozenberg, Julie, and Marianne Fay. 2019. Beyond the Gap: How Countries Can Afford the Infrastructure They Need While Protecting the Planet. The World Bank. https://elibrary.worldbank.org/doi/abs/10.1596/978-1-4648-1363-4	McCollum, David L., Zhou, Wenji, Bertram, Christoph, de Boer, Harmen-Sytze, Bosetti, Valentina, Busch, Sebastian, Després, Jacques, et al., 2018. Energy investment needs for fulfilling the paris agreement and achieving the sustainable development goals. Nat. Energy 7, 589–599.	Rozenberg, Julie, and Marianne Fay. 2019. Beyond the Gap: How Countries Can Afford the Infrastructure They Need While Protecting the Planet. The World Bank. https://elibrary.worldbank.org/doi/abs/10.1596/978-1-4648-1363-4	Dulac, John, 2013. Global land transport infrastructure requirements: estimating road and railway infrastructure capacity and costs to 2050. International Energy Agency 1–54.	Fisch-Romito, Vivien, and Céline Guivarch. 2019. “Transportation Infrastructures in a Low Carbon World: An Evaluation of Investment Needs and Their Determinants.” Transportation Research Part D: Transport and Environment 72 (July): 203–19. https://doi.org/10.1016/j.trd.2019.04.014.	OECD (2017), Investing in Climate, Investing in Growth, OECD Publishing, Paris. http://dx.doi.org/10.1787/9789264273528-en	OECD (2017), Investing in Climate, Investing in Growth, OECD Publishing, Paris. http://dx.doi.org/10.1787/9789264273528-en	McCollum, David L., Zhou, Wenji, Bertram, Christoph, de Boer, Harmen-Sytze, Bosetti, Valentina, Busch, Sebastian, Després, Jacques, et al., 2018. Energy investment needs for fulfilling the paris agreement and achieving the sustainable development goals. Nat. Energy 7, 589–599.	Bertram, C., Riahi, K., Hilaire, J., Bosetti, V., Drouet, L., Fricko, O., Malik, A., Nogueira, L. P., Van Der Zwaan, B., Van Ruijven, B., Van Vuuren, D., Weitzel, M., Longa, F. D., De Boer, H. S., Emmerling, J., Fosse, F., Fragkiadakis, K., Harmsen, M., Keramidas, K., … Luderer, G. (2021). Energy system developments and investments in the decisive decade for the Paris Agreement goals. Environment…	Schinko, T., Drouet, L., Vrontisi, Z., Hof, A., Hinkel, J., Mochizuki, J., Bosetti, V., Fragkiadakis, K., van Vuuren, D., & Lincke, D. (2020). Economy-wide effects of coastal flooding due to sea level rise: A multi-model simultaneous treatment of mitigation, adaptation, and residual impacts. Environmental Research Communications, 2(1). https://doi.org/10.1088/2515-7620/ab6368	United Nations Educational, Scientific and Cultural Organization (UNESCO). (2020). Act now: reduce the impact of COVID-19 on the cost of achieving SDG 4

## Sheet: Table B. Scopus keywords
SDG	Keywords	Results
SDG 1	TITLE-ABS-KEY ( ( {SDG1} OR {SDG 1} OR ({Sustainable Development*}) OR ({zero} OR {no} OR {eradicat*})) AND ( {extreme poverty} OR {poverty alleviation} OR {poverty eradication} OR {poverty reduction} OR {international poverty line} OR ( {financial aid} AND {poverty} ) OR ( {financial aid} AND {poor} ) OR ( {financial aid} AND {north-south divide} ) OR ( {financial development} AND {poverty} ) OR…	6
SDG 2	TITLE-ABS-KEY ( ( {SDG2} OR {SDG 2} OR ({Sustainable Development*}) OR ({zero} OR {eradicat*})) AND ( {extreme poverty} OR {poverty alleviation} OR {poverty eradication} OR {poverty reduction} OR {international poverty line} OR ( {financial aid} AND {poverty} ) OR ( {financial aid} AND {poor} ) OR ( {financial aid} AND {north-south divide} ) OR ( {financial development} AND {poverty} ) OR {financ…	1
SDG 3	TITLE-ABS-KEY ( ( {SDG3} OR {SDG 3} OR ({Sustainable Development*}) OR ({zero} OR {eradicat*} OR {good})) AND ( ( human AND ( health* OR disease* OR illness* OR medicine* OR mortality) ) OR {cardiovascular disease} OR {cardiovascular diseases} OR {chagas} OR {water-borne disease} OR {water-borne diseases} OR {water borne disease} OR {water borne diseases} OR {tropical disease} OR {tropical diseas…	4
SDG 4	TITLE-ABS-KEY ( ( {SDG4} OR {SDG 4} OR {Sustainable Development*}) AND (( school OR education OR educational ) AND ( {inclusive education} OR {educational inequality} OR {education quality} OR {educational enrolment} OR {educational enrollment} OR {adult literacy} OR {numeracy rate} OR {educational environment} OR {educational access} OR ( {development aid} AND {teacher training} ) OR {early chil…	0
SDG 5	TITLE-ABS-KEY ( ( {SDG5} OR {SDG 5} OR {Sustainable Development*}) AND ( {gender inequality} OR {gender equality} OR {employment equity} OR {gender wage gap} OR {female labor force participation} OR {female labour force participation} OR {women labor force participation} OR {women labour force participation} OR {womens' employment} OR {female employment} OR {women's unemployment} OR {female unemp…	0
SDG 6	TITLE-ABS-KEY ( ( {SDG6} OR {SDG 6} OR {Sustainable Development*}) AND ( ( ( {Safe} AND ( {water access} OR {drinking water} ) ) OR ( {clean} AND ( {drinking water} OR {water source} ) ) OR ( {water} AND ( {sanitation and hygiene} OR {sanitation & hygiene} OR {quality} OR {resource} ) AND ( {water availability} OR {water-use efficiency} OR {water supply} OR {water supplies} OR {clean water} OR {h…	132
SDG 7	TITLE-ABS-KEY ( ( {SDG7} OR {SDG 7} OR {Sustainable Development*}) AND ( {energy efficiency} OR {energy consumption} OR {energy transition} OR {clean energy technology} OR {energy equity} OR {energy justice} OR {energy poverty} OR {energy policy} OR renewable* OR {2000 Watt society} OR {smart micro-grid} OR {smart grid} OR {smart microgrid} OR {smart micro-grids} OR {smart grids} OR {smart microg…	235
SDG 8	TITLE-ABS-KEY ( ( {SDG8} OR {SDG 8} OR {Sustainable Development*}) AND ( {economic growth} OR {economic development policy} OR {employment policy} OR {inclusive economic growth} OR {sustainable growth} OR {economic development} OR {economic globalization} OR {economic globalisation} OR {economic productivity} OR {low-carbon economy} OR {inclusive growth} OR microfinanc* OR micro-financ* OR micro-…	85
SDG 9	TITLE-ABS-KEY ( ( {SDG9} OR {SDG 9} OR {Sustainable Development*}) AND ( {industrial growth} OR {industrial diversification} OR {infrastructural development} OR {infrastructural investment} OR {infrastructure investment} OR {public infrastructure} OR {resilient infrastructure} OR {transborder infrastructure} OR {public infrastructures} OR {resilient infrastructures} OR {transborder infrastructure…	0
SDG 10	TITLE-ABS-KEY ( ( {SDG10} OR {SDG 10} OR {Sustainable Development*}) AND ( ( equality AND ( economic OR financial OR socio-economic ) ) OR ( inequality AND ( economic OR financial OR socio-economic ) ) OR {economic reform policy} OR {economic reform policies} OR {political inclusion} OR {social protection policy} OR {social protection policies} OR ( immigration AND NOT ( chemistry OR disease OR b…	0
SDG 11	TITLE-ABS-KEY ( ( {SDG11} OR {SDG 11} OR {Sustainable Development*}) AND ( city OR cities OR {human settlement} OR {human settlements} OR urban OR metropoli* OR town* OR municipal* ) AND ( gentrification OR congestion OR transportation OR {public transport} OR housing OR slum* OR {sendai framework} OR {Disaster Risk Reduction} OR {DRR} OR {smart city} OR {smart cities} OR {resilient building} OR …	0
SDG 12	TITLE-ABS-KEY ( ( {SDG12} OR {SDG 12} OR {Sustainable Development*}) AND ({environmental pollution} OR {hazardous waste} OR {hazardous chemical} OR {hazardous chemicals} OR {toxic chemical} OR {toxic chemicals} OR {chemical pollution} OR {ozone depletion} OR {pesticide pollution} OR {pesticide stress} OR {pesticide reduction} OR {life cycle assessment} OR {life cycle analysis} OR {life cycle anal…	0
SDG 13	TITLE-ABS-KEY ( ( {SDG13} OR {SDG 13} OR {Sustainable Development*}) AND ( {climate action} OR {climate adaptation} OR {climate change} OR {climate capitalism} OR ipcc OR {climate effect} OR {climate equity} OR {climate feedback} OR {climate finance} OR {climate change financing} OR {climate forcing} OR {climate governance} OR {climate impact} OR {climate investment} OR {climate justice} OR {clim…	164
SDG 14	TITLE-ABS-KEY ( ( {SDG14} OR {SDG 14} OR {Sustainable Development*}) AND ( marine OR ocean OR oceans OR sea OR seas OR coast* OR mangrove ) AND ( {water cycle} OR {water cycles} OR {biogeochemical cycle} OR {biogeochemical cycles} OR {oceanic circulation model} OR {oceanic circulation models} OR {oceanic circulation modelling} OR {oceanic circulation modeling} OR {ice-ocean} OR eutrophicat* OR ma…	81
SDG 15	TITLE-ABS-KEY ( ( {SDG15} OR {SDG 15} OR {Sustainable Development*}) AND ( terrestrial OR land OR inland OR freshwater ) AND ( biodivers* OR {species richness} OR bioeconom* OR bio-econom* OR {biological production} OR deforest* OR desertif* OR {earth system} OR {ecological resilience} OR ecosystem* OR eco-system* OR {trophic cascade} OR {trophic level} OR {trophic web} OR {threatened species} OR…	0
SDG 16	TITLE-ABS-KEY ( ( {SDG16} OR {SDG 16} OR {Sustainable Development*}) AND ( {actual innocence} OR {false confession} OR {armed conflict} OR {armed conflicts} OR {civil conflict} OR {civil conflicts} OR ( war AND ( conflict OR warfare OR democracy OR {Geneva Convention} OR treaty OR peace ) ) OR {peacekeeping} OR ( corruption AND ( {institution} OR {public official} OR {government} OR {bribery} OR …	37

## Sheet: Table C.SDG targets &indicators
source: https://unstats.un.org/sdgs/indicators/indicators-list/ (accessed April 12, 2022)
	Global indicator framework for the Sustainable Development Goals and targets of the 2030 Agenda for Sustainable Development*
	Sustainable Development Goal indicators should be disaggregated, where relevant, by income, sex, age, race, ethnicity, migratory status, disability and geographic location, or other characteristics, in accordance with the Fundamental Principles of Official Statistics.1
	Goals and targets (from the 2030 Agenda for Sustainable Development)	Indicators
	Goal 1. End poverty in all its forms everywhere
	1.1 By 2030, eradicate extreme poverty for all people everywhere, currently measured as people living on less than $1.25 a day	1.1.1 Proportion of the population living below the international poverty line by sex, age, employment status and geographic location (urban/rural)
	1.2 By 2030, reduce at least by half the proportion of men, women and children of all ages living in poverty in all its dimensions according to national definitions	1.2.1 Proportion of population living below the national poverty line, by sex and age
		1.2.2 Proportion of men, women and children of all ages living in poverty in all its dimensions according to national definitions
	1.3 Implement nationally appropriate social protection systems and measures for all, including floors, and by 2030 achieve substantial coverage of the poor and the vulnerable	1.3.1 Proportion of population covered by social protection floors/systems, by sex, distinguishing children, unemployed persons, older persons, persons with disabilities, pregnant women, newborns, work-injury victims and the poor and the vulnerable
	1.4 By 2030, ensure that all men and women, in particular the poor and the vulnerable, have equal rights to economic resources, as well as access to basic services, ownership and control over land and other forms of property, inheritance, natural resources, appropriate new technology and financial services, including microfinance	1.4.1 Proportion of population living in households with access to basic services
		1.4.2 Proportion of total adult population with secure tenure rights to land, (a) with legally recognized documentation, and (b) who perceive their rights to land as secure, by sex and type of tenure
	1.5 By 2030, build the resilience of the poor and those in vulnerable situations and reduce their exposure and vulnerability to climate-related extreme events and other economic, social and environmental shocks and disasters	1.5.1 Number of deaths, missing persons and directly affected persons attributed to disasters per 100,000 population
		1.5.2 Direct economic loss attributed to disasters in relation to global gross domestic product (GDP)
		1.5.3 Number of countries that adopt and implement national disaster risk reduction strategies in line with the Sendai Framework for Disaster Risk Reduction 2015–2030
		1.5.4 Proportion of local governments that adopt and implement local disaster risk reduction strategies in line with national disaster risk reduction strategies
	1.a Ensure significant mobilization of resources from a variety of sources, including through enhanced development cooperation, in order to provide adequate and predictable means for developing countries, in particular least developed countries, to implement programmes and policies to end poverty in all its dimensions	1.a.1 Total official development assistance grants from all donors that focus on poverty reduction as a share of the recipient country’s gross national income
		1.a.2 Proportion of total government spending on essential services (education, health and social protection)
	1.b Create sound policy frameworks at the national, regional and international levels, based on pro-poor and gender-sensitive development strategies, to support accelerated investment in poverty eradication actions	1.b.1 Pro-poor public social spending
	Goal 2. End hunger, achieve food security and improved nutrition and promote sustainable agriculture
	2.1 By 2030, end hunger and ensure access by all people, in particular the poor and people in vulnerable situations, including infants, to safe, nutritious and sufficient food all year round	2.1.1 Prevalence of undernourishment
		2.1.2 Prevalence of moderate or severe food insecurity in the population, based on the Food Insecurity Experience Scale (FIES)
	2.2 By 2030, end all forms of malnutrition, including achieving, by 2025, the internationally agreed targets on stunting and wasting in children under 5 years of age, and address the nutritional needs of adolescent girls, pregnant and lactating women and older persons	2.2.1 Prevalence of stunting (height for age <-2 standard deviation from the median of the World Health Organization (WHO) Child Growth Standards) among children under 5 years of age
		2.2.2 Prevalence of malnutrition (weight for height >+2 or <-2 standard deviation from the median of the WHO Child Growth Standards) among children under 5 years of age, by type (wasting and overweight)
		2.2.3 Prevalence of anaemia in women aged 15 to 49 years, by pregnancy status (percentage)
	2.3 By 2030, double the agricultural productivity and incomes of small-scale food producers, in particular women, indigenous peoples, family farmers, pastoralists and fishers, including through secure and equal access to land, other productive resources and inputs, knowledge, financial services, markets and opportunities for value addition and non-farm employment	2.3.1 Volume of production per labour unit by classes of farming/pastoral/forestry enterprise size
		2.3.2 Average income of small-scale food producers, by sex and indigenous status
	2.4 By 2030, ensure sustainable food production systems and implement resilient agricultural practices that increase productivity and production, that help maintain ecosystems, that strengthen capacity for adaptation to climate change, extreme weather, drought, flooding and other disasters and that progressively improve land and soil quality	2.4.1 Proportion of agricultural area under productive and sustainable agriculture
	2.5 By 2020, maintain the genetic diversity of seeds, cultivated plants and farmed and domesticated animals and their related wild species, including through soundly managed and diversified seed and plant banks at the national, regional and international levels, and promote access to and fair and equitable sharing of benefits arising from the utilization of genetic resources and associated tradit…	2.5.1 Number of (a) plant and (b) animal genetic resources for food and agriculture secured in either medium- or long-term conservation facilities
		2.5.2 Proportion of local breeds classified as being at risk of extinction
	2.a Increase investment, including through enhanced international cooperation, in rural infrastructure, agricultural research and extension services, technology development and plant and livestock gene banks in order to enhance agricultural productive capacity in developing countries, in particular least developed countries	2.a.1 The agriculture orientation index for government expenditures
		2.a.2 Total official flows (official development assistance plus other official flows) to the agriculture sector
	2.b Correct and prevent trade restrictions and distortions in world agricultural markets, including through the parallel elimination of all forms of agricultural export subsidies and all export measures with equivalent effect, in accordance with the mandate of the Doha Development Round	2.b.1 Agricultural export subsidies
	2.c Adopt measures to ensure the proper functioning of food commodity markets and their derivatives and facilitate timely access to market information, including on food reserves, in order to help limit extreme food price volatility	2.c.1 Indicator of food price anomalies
	Goal 3. Ensure healthy lives and promote well-being for all at all ages
	3.1 By 2030, reduce the global maternal mortality ratio to less than 70 per 100,000 live births	3.1.1 Maternal mortality ratio
		3.1.2 Proportion of births attended by skilled health personnel
	3.2 By 2030, end preventable deaths of newborns and children under 5 years of age, with all countries aiming to reduce neonatal mortality to at least as low as 12 per 1,000 live births and under‑5 mortality to at least as low as 25 per 1,000 live births	3.2.1 Under‑5 mortality rate
		3.2.2 Neonatal mortality rate
	3.3 By 2030, end the epidemics of AIDS, tuberculosis, malaria and neglected tropical diseases and combat hepatitis, water-borne diseases and other communicable diseases	3.3.1 Number of new HIV infections per 1,000 uninfected population, by sex, age and key populations
		3.3.2 Tuberculosis incidence per 100,000 population
		3.3.3 Malaria incidence per 1,000 population
		3.3.4 Hepatitis B incidence per 100,000 population
		3.3.5 Number of people requiring interventions against neglected tropical diseases
	3.4 By 2030, reduce by one third premature mortality from non-communicable diseases through prevention and treatment and promote mental health and well-being	3.4.1 Mortality rate attributed to cardiovascular disease, cancer, diabetes or chronic respiratory disease
		3.4.2 Suicide mortality rate
	3.5 Strengthen the prevention and treatment of substance abuse, including narcotic drug abuse and harmful use of alcohol	3.5.1 Coverage of treatment interventions (pharmacological, psychosocial and rehabilitation and aftercare services) for substance use disorders
		3.5.2 Alcohol per capita consumption (aged 15 years and older) within a calendar year in litres of pure alcohol
	3.6 By 2020, halve the number of global deaths and injuries from road traffic accidents	3.6.1 Death rate due to road traffic injuries
	3.7 By 2030, ensure universal access to sexual and reproductive health-care services, including for family planning, information and education, and the integration of reproductive health into national strategies and programmes	3.7.1 Proportion of women of reproductive age (aged 15–49 years) who have their need for family planning satisfied with modern methods
		3.7.2 Adolescent birth rate (aged 10–14 years; aged 15–19 years) per 1,000 women in that age group
	3.8 Achieve universal health coverage, including financial risk protection, access to quality essential health-care services and access to safe, effective, quality and affordable essential medicines and vaccines for all	3.8.1 Coverage of essential health services
		3.8.2 Proportion of population with large household expenditures on health as a share of total household expenditure or income
	3.9 By 2030, substantially reduce the number of deaths and illnesses from hazardous chemicals and air, water and soil pollution and contamination	3.9.1 Mortality rate attributed to household and ambient air pollution
		3.9.2 Mortality rate attributed to unsafe water, unsafe sanitation and lack of hygiene (exposure to unsafe Water, Sanitation and Hygiene for All (WASH) services)
		3.9.3 Mortality rate attributed to unintentional poisoning
	3.a Strengthen the implementation of the World Health Organization Framework Convention on Tobacco Control in all countries, as appropriate	3.a.1 Age-standardized prevalence of current tobacco use among persons aged 15 years and older
	3.b Support the research and development of vaccines and medicines for the communicable and non‑communicable diseases that primarily affect developing countries, provide access to affordable essential medicines and vaccines, in accordance with the Doha Declaration on the TRIPS Agreement and Public Health, which affirms the right of developing countries to use to the full the provisions in the Agr…	3.b.1 Proportion of the target population covered by all vaccines included in their national programme
		3.b.2 Total net official development assistance to medical research and basic health sectors
		3.b.3 Proportion of health facilities that have a core set of relevant essential medicines available and affordable on a sustainable basis
	3.c Substantially increase health financing and the recruitment, development, training and retention of the health workforce in developing countries, especially in least developed countries and small island developing States	3.c.1 Health worker density and distribution
	3.d Strengthen the capacity of all countries, in particular developing countries, for early warning, risk reduction and management of national and global health risks	3.d.1 International Health Regulations (IHR) capacity and health emergency preparedness
		3.d.2 Percentage of bloodstream infections due to selected antimicrobial-resistant organisms
	Goal 4. Ensure inclusive and equitable quality education and promote lifelong learning opportunities for all
	4.1 By 2030, ensure that all girls and boys complete free, equitable and quality primary and secondary education leading to relevant and effective learning outcomes	4.1.1 Proportion of children and young people (a) in grades 2/3; (b) at the end of primary; and (c) at the end of lower secondary achieving at least a minimum proficiency level in (i) reading and (ii) mathematics, by sex
		4.1.2 Completion rate (primary education, lower secondary education, upper secondary education)
	4.2 By 2030, ensure that all girls and boys have access to quality early childhood development, care and pre‑primary education so that they are ready for primary education	4.2.1 Proportion of children aged 24–59 months who are developmentally on track in health, learning and psychosocial well-being, by sex
		4.2.2 Participation rate in organized learning (one year before the official primary entry age), by sex
	4.3 By 2030, ensure equal access for all women and men to affordable and quality technical, vocational and tertiary education, including university	4.3.1 Participation rate of youth and adults in formal and non-formal education and training in the previous 12 months, by sex
	4.4 By 2030, substantially increase the number of youth and adults who have relevant skills, including technical and vocational skills, for employment, decent jobs and entrepreneurship	4.4.1 Proportion of youth and adults with information and communications technology (ICT) skills, by type of skill
	4.5 By 2030, eliminate gender disparities in education and ensure equal access to all levels of education and vocational training for the vulnerable, including persons with disabilities, indigenous peoples and children in vulnerable situations	4.5.1 Parity indices (female/male, rural/urban, bottom/top wealth quintile and others such as disability status, indigenous peoples and conflict-affected, as data become available) for all education indicators on this list that can be disaggregated
	4.6 By 2030, ensure that all youth and a substantial proportion of adults, both men and women, achieve literacy and numeracy	4.6.1 Proportion of population in a given age group achieving at least a fixed level of proficiency in functional (a) literacy and (b) numeracy skills, by sex
	4.7 By 2030, ensure that all learners acquire the knowledge and skills needed to promote sustainable development, including, among others, through education for sustainable development and sustainable lifestyles, human rights, gender equality, promotion of a culture of peace and non-violence, global citizenship and appreciation of cultural diversity and of culture’s contribution to sustainable de…	4.7.1 Extent to which (i) global citizenship education and (ii) education for sustainable development are mainstreamed in (a) national education policies; (b) curricula; (c) teacher education; and (d) student assessment
	4.a Build and upgrade education facilities that are child, disability and gender sensitive and provide safe, non-violent, inclusive and effective learning environments for all	4.a.1 Proportion of schools offering basic services, by type of service
	4.b By 2020, substantially expand globally the number of scholarships available to developing countries, in particular least developed countries, small island developing States and African countries, for enrolment in higher education, including vocational training and information and communications technology, technical, engineering and scientific programmes, in developed countries and other deve…	4.b.1 Volume of official development assistance flows for scholarships by sector and type of study
	4.c By 2030, substantially increase the supply of qualified teachers, including through international cooperation for teacher training in developing countries, especially least developed countries and small island developing States	4.c.1 Proportion of teachers with the minimum required qualifications, by education level
	Goal 5. Achieve gender equality and empower all women and girls
	5.1 End all forms of discrimination against all women and girls everywhere	5.1.1 Whether or not legal frameworks are in place to promote, enforce and monitor equality and non‑discrimination on the basis of sex
	5.2 Eliminate all forms of violence against all women and girls in the public and private spheres, including trafficking and sexual and other types of exploitation	5.2.1 Proportion of ever-partnered women and girls aged 15 years and older subjected to physical, sexual or psychological violence by a current or former intimate partner in the previous 12 months, by form of violence and by age
		5.2.2 Proportion of women and girls aged 15 years and older subjected to sexual violence by persons other than an intimate partner in the previous 12 months, by age and place of occurrence
	5.3 Eliminate all harmful practices, such as child, early and forced marriage and female genital mutilation	5.3.1 Proportion of women aged 20–24 years who were married or in a union before age 15 and before age 18
		5.3.2 Proportion of girls and women aged 15–49 years who have undergone female genital mutilation/cutting, by age
	5.4 Recognize and value unpaid care and domestic work through the provision of public services, infrastructure and social protection policies and the promotion of shared responsibility within the household and the family as nationally appropriate	5.4.1 Proportion of time spent on unpaid domestic and care work, by sex, age and location
	5.5 Ensure women’s full and effective participation and equal opportunities for leadership at all levels of decision-making in political, economic and public life	5.5.1 Proportion of seats held by women in (a) national parliaments and (b) local governments
		5.5.2 Proportion of women in managerial positions
	5.6 Ensure universal access to sexual and reproductive health and reproductive rights as agreed in accordance with the Programme of Action of the International Conference on Population and Development and the Beijing Platform for Action and the outcome documents of their review conferences	5.6.1 Proportion of women aged 15–49 years who make their own informed decisions regarding sexual relations, contraceptive use and reproductive health care
		5.6.2 Number of countries with laws and regulations that guarantee full and equal access to women and men aged 15 years and older to sexual and reproductive health care, information and education
	5.a Undertake reforms to give women equal rights to economic resources, as well as access to ownership and control over land and other forms of property, financial services, inheritance and natural resources, in accordance with national laws	5.a.1 (a) Proportion of total agricultural population with ownership or secure rights over agricultural land, by sex; and (b) share of women among owners or rights-bearers of agricultural land, by type of tenure
		5.a.2 Proportion of countries where the legal framework (including customary law) guarantees women’s equal rights to land ownership and/or control
	5.b Enhance the use of enabling technology, in particular information and communications technology, to promote the empowerment of women	5.b.1 Proportion of individuals who own a mobile telephone, by sex
	5.c Adopt and strengthen sound policies and enforceable legislation for the promotion of gender equality and the empowerment of all women and girls at all levels	5.c.1 Proportion of countries with systems to track and make public allocations for gender equality and women’s empowerment
	Goal 6. Ensure availability and sustainable management of water and sanitation for all
	6.1 By 2030, achieve universal and equitable access to safe and affordable drinking water for all	6.1.1 Proportion of population using safely managed drinking water services
	6.2 By 2030, achieve access to adequate and equitable sanitation and hygiene for all and end open defecation, paying special attention to the needs of women and girls and those in vulnerable situations	6.2.1 Proportion of population using (a) safely managed sanitation services and (b) a hand-washing facility with soap and water
	6.3 By 2030, improve water quality by reducing pollution, eliminating dumping and minimizing release of hazardous chemicals and materials, halving the proportion of untreated wastewater and substantially increasing recycling and safe reuse globally	6.3.1 Proportion of domestic and industrial wastewater flows safely treated
		6.3.2 Proportion of bodies of water with good ambient water quality
	6.4 By 2030, substantially increase water-use efficiency across all sectors and ensure sustainable withdrawals and supply of freshwater to address water scarcity and substantially reduce the number of people suffering from water scarcity	6.4.1 Change in water-use efficiency over time
		6.4.2 Level of water stress: freshwater withdrawal as a proportion of available freshwater resources
	6.5 By 2030, implement integrated water resources management at all levels, including through transboundary cooperation as appropriate	6.5.1 Degree of integrated water resources management
		6.5.2 Proportion of transboundary basin area with an operational arrangement for water cooperation
	6.6 By 2020, protect and restore water-related ecosystems, including mountains, forests, wetlands, rivers, aquifers and lakes	6.6.1 Change in the extent of water-related ecosystems over time
	6.a By 2030, expand international cooperation and capacity-building support to developing countries in water- and sanitation-related activities and programmes, including water harvesting, desalination, water efficiency, wastewater treatment, recycling and reuse technologies	6.a.1 Amount of water- and sanitation-related official development assistance that is part of a government-coordinated spending plan
	6.b Support and strengthen the participation of local communities in improving water and sanitation management	6.b.1 Proportion of local administrative units with established and operational policies and procedures for participation of local communities in water and sanitation management
	Goal 7. Ensure access to affordable, reliable, sustainable and modern energy for all
	7.1 By 2030, ensure universal access to affordable, reliable and modern energy services	7.1.1 Proportion of population with access to electricity
		7.1.2 Proportion of population with primary reliance on clean fuels and technology
	7.2 By 2030, increase substantially the share of renewable energy in the global energy mix	7.2.1 Renewable energy share in the total final energy consumption
	7.3 By 2030, double the global rate of improvement in energy efficiency	7.3.1 Energy intensity measured in terms of primary energy and GDP
	7.a By 2030, enhance international cooperation to facilitate access to clean energy research and technology, including renewable energy, energy efficiency and advanced and cleaner fossil-fuel technology, and promote investment in energy infrastructure and clean energy technology	7.a.1 International financial flows to developing countries in support of clean energy research and development and renewable energy production, including in hybrid systems
	7.b By 2030, expand infrastructure and upgrade technology for supplying modern and sustainable energy services for all in developing countries, in particular least developed countries, small island developing States and landlocked developing countries, in accordance with their respective programmes of support	7.b.1 Installed renewable energy-generating capacity in developing countries (in watts per capita)
	Goal 8. Promote sustained, inclusive and sustainable economic growth, full and productive employment and decent work for all
	8.1 Sustain per capita economic growth in accordance with national circumstances and, in particular, at least 7 per cent gross domestic product growth per annum in the least developed countries	8.1.1 Annual growth rate of real GDP per capita
	8.2 Achieve higher levels of economic productivity through diversification, technological upgrading and innovation, including through a focus on high-value added and labour-intensive sectors	8.2.1 Annual growth rate of real GDP per employed person
	8.3 Promote development-oriented policies that support productive activities, decent job creation, entrepreneurship, creativity and innovation, and encourage the formalization and growth of micro-, small- and medium-sized enterprises, including through access to financial services	8.3.1 Proportion of informal employment in total employment, by sector and sex
	8.4 Improve progressively, through 2030, global resource efficiency in consumption and production and endeavour to decouple economic growth from environmental degradation, in accordance with the 10‑Year Framework of Programmes on Sustainable Consumption and Production, with developed countries taking the lead	8.4.1 Material footprint, material footprint per capita, and material footprint per GDP
		8.4.2 Domestic material consumption, domestic material consumption per capita, and domestic material consumption per GDP
	8.5 By 2030, achieve full and productive employment and decent work for all women and men, including for young people and persons with disabilities, and equal pay for work of equal value	8.5.1 Average hourly earnings of employees, by sex, age, occupation and persons with disabilities
		8.5.2 Unemployment rate, by sex, age and persons with disabilities
	8.6 By 2020, substantially reduce the proportion of youth not in employment, education or training	8.6.1 Proportion of youth (aged 15–24 years) not in education, employment or training
	8.7 Take immediate and effective measures to eradicate forced labour, end modern slavery and human trafficking and secure the prohibition and elimination of the worst forms of child labour, including recruitment and use of child soldiers, and by 2025 end child labour in all its forms	8.7.1 Proportion and number of children aged 5–17 years engaged in child labour, by sex and age
	8.8 Protect labour rights and promote safe and secure working environments for all workers, including migrant workers, in particular women migrants, and those in precarious employment	8.8.1 Fatal and non-fatal occupational injuries per 100,000 workers, by sex and migrant status
		8.8.2 Level of national compliance with labour rights (freedom of association and collective bargaining) based on International Labour Organization (ILO) textual sources and national legislation, by sex and migrant status
	8.9 By 2030, devise and implement policies to promote sustainable tourism that creates jobs and promotes local culture and products	8.9.1 Tourism direct GDP as a proportion of total GDP and in growth rate
	8.10 Strengthen the capacity of domestic financial institutions to encourage and expand access to banking, insurance and financial services for all	8.10.1 (a) Number of commercial bank branches per 100,000 adults and (b) number of automated teller machines (ATMs) per 100,000 adults
		8.10.2 Proportion of adults (15 years and older) with an account at a bank or other financial institution or with a mobile-money-service provider
	8.a Increase Aid for Trade support for developing countries, in particular least developed countries, including through the Enhanced Integrated Framework for Trade-related Technical Assistance to Least Developed Countries	8.a.1 Aid for Trade commitments and disbursements
	8.b By 2020, develop and operationalize a global strategy for youth employment and implement the Global Jobs Pact of the International Labour Organization	8.b.1 Existence of a developed and operationalized national strategy for youth employment, as a distinct strategy or as part of a national employment strategy
	Goal 9. Build resilient infrastructure, promote inclusive and sustainable industrialization and foster innovation
	9.1 Develop quality, reliable, sustainable and resilient infrastructure, including regional and transborder infrastructure, to support economic development and human well-being, with a focus on affordable and equitable access for all	9.1.1 Proportion of the rural population who live within 2 km of an all-season road
		9.1.2 Passenger and freight volumes, by mode of transport
	9.2 Promote inclusive and sustainable industrialization and, by 2030, significantly raise industry’s share of employment and gross domestic product, in line with national circumstances, and double its share in least developed countries	9.2.1 Manufacturing value added as a proportion of GDP and per capita
		9.2.2 Manufacturing employment as a proportion of total employment
	9.3 Increase the access of small-scale industrial and other enterprises, in particular in developing countries, to financial services, including affordable credit, and their integration into value chains and markets	9.3.1 Proportion of small-scale industries in total industry value added
		9.3.2 Proportion of small-scale industries with a loan or line of credit
	9.4 By 2030, upgrade infrastructure and retrofit industries to make them sustainable, with increased resource-use efficiency and greater adoption of clean and environmentally sound technologies and industrial processes, with all countries taking action in accordance with their respective capabilities	9.4.1 CO2 emission per unit of value added
	9.5 Enhance scientific research, upgrade the technological capabilities of industrial sectors in all countries, in particular developing countries, including, by 2030, encouraging innovation and substantially increasing the number of research and development workers per 1 million people and public and private research and development spending	9.5.1 Research and development expenditure as a proportion of GDP
		9.5.2 Researchers (in full-time equivalent) per million inhabitants
	9.a Facilitate sustainable and resilient infrastructure development in developing countries through enhanced financial, technological and technical support to African countries, least developed countries, landlocked developing countries and small island developing States	9.a.1 Total official international support (official development assistance plus other official flows) to infrastructure
	9.b Support domestic technology development, research and innovation in developing countries, including by ensuring a conducive policy environment for, inter alia, industrial diversification and value addition to commodities	9.b.1 Proportion of medium and high-tech industry value added in total value added
	9.c Significantly increase access to information and communications technology and strive to provide universal and affordable access to the Internet in least developed countries by 2020	9.c.1 Proportion of population covered by a mobile network, by technology
	Goal 10. Reduce inequality within and among countries
	10.1 By 2030, progressively achieve and sustain income growth of the bottom 40 per cent of the population at a rate higher than the national average	10.1.1 Growth rates of household expenditure or income per capita among the bottom 40 per cent of the population and the total population
	10.2 By 2030, empower and promote the social, economic and political inclusion of all, irrespective of age, sex, disability, race, ethnicity, origin, religion or economic or other status	10.2.1 Proportion of people living below 50 per cent of median income, by sex, age and persons with disabilities
	10.3 Ensure equal opportunity and reduce inequalities of outcome, including by eliminating discriminatory laws, policies and practices and promoting appropriate legislation, policies and action in this regard	10.3.1 Proportion of population reporting having personally felt discriminated against or harassed in the previous 12 months on the basis of a ground of discrimination prohibited under international human rights law
	10.4 Adopt policies, especially fiscal, wage and social protection policies, and progressively achieve greater equality	10.4.1 Labour share of GDP
		10.4.2 Redistributive impact of fiscal policy4
	10.5 Improve the regulation and monitoring of global financial markets and institutions and strengthen the implementation of such regulations	10.5.1 Financial Soundness Indicators
	10.6 Ensure enhanced representation and voice for developing countries in decision-making in global international economic and financial institutions in order to deliver more effective, credible, accountable and legitimate institutions	10.6.1 Proportion of members and voting rights of developing countries in international organizations
	10.7 Facilitate orderly, safe, regular and responsible migration and mobility of people, including through the implementation of planned and well-managed migration policies	10.7.1 Recruitment cost borne by employee as a proportion of monthly income earned in country of destination
		10.7.2 Number of countries with migration policies that facilitate orderly, safe, regular and responsible migration and mobility of people
		10.7.3 Number of people who died or disappeared in the process of migration towards an international destination
		10.7.4 Proportion of the population who are refugees, by country of origin
	10.a Implement the principle of special and differential treatment for developing countries, in particular least developed countries, in accordance with World Trade Organization agreements	10.a.1 Proportion of tariff lines applied to imports from least developed countries and developing countries with zero-tariff
	10.b Encourage official development assistance and financial flows, including foreign direct investment, to States where the need is greatest, in particular least developed countries, African countries, small island developing States and landlocked developing countries, in accordance with their national plans and programmes	10.b.1 Total resource flows for development, by recipient and donor countries and type of flow (e.g. official development assistance, foreign direct investment and other flows)
	10.c By 2030, reduce to less than 3 per cent the transaction costs of migrant remittances and eliminate remittance corridors with costs higher than 5 per cent	10.c.1 Remittance costs as a proportion of the amount remitted
	Goal 11. Make cities and human settlements inclusive, safe, resilient and sustainable
	11.1 By 2030, ensure access for all to adequate, safe and affordable housing and basic services and upgrade slums	11.1.1 Proportion of urban population living in slums, informal settlements or inadequate housing
	11.2 By 2030, provide access to safe, affordable, accessible and sustainable transport systems for all, improving road safety, notably by expanding public transport, with special attention to the needs of those in vulnerable situations, women, children, persons with disabilities and older persons	11.2.1 Proportion of population that has convenient access to public transport, by sex, age and persons with disabilities
	11.3 By 2030, enhance inclusive and sustainable urbanization and capacity for participatory, integrated and sustainable human settlement planning and management in all countries	11.3.1 Ratio of land consumption rate to population growth rate
		11.3.2 Proportion of cities with a direct participation structure of civil society in urban planning and management that operate regularly and democratically
	11.4 Strengthen efforts to protect and safeguard the world’s cultural and natural heritage	11.4.1 Total per capita expenditure on the preservation, protection and conservation of all cultural and natural heritage, by source of funding (public, private), type of heritage (cultural, natural) and level of government (national, regional, and local/municipal)
	11.5 By 2030, significantly reduce the number of deaths and the number of people affected and substantially decrease the direct economic losses relative to global gross domestic product caused by disasters, including water-related disasters, with a focus on protecting the poor and people in vulnerable situations	11.5.1 Number of deaths, missing persons and directly affected persons attributed to disasters per 100,000 population
		11.5.2 Direct economic loss attributed to disasters in relation to global gross domestic product (GDP)
		11.5.3 (a) Damage to critical infrastructure and (b) number of disruptions to basic services, attributed to disasters
	11.6 By 2030, reduce the adverse per capita environmental impact of cities, including by paying special attention to air quality and municipal and other waste management	11.6.1 Proportion of municipal solid waste collected and managed in controlled facilities out of total municipal waste generated, by cities
		11.6.2 Annual mean levels of fine particulate matter (e.g. PM2.5 and PM10) in cities (population weighted)
	11.7 By 2030, provide universal access to safe, inclusive and accessible, green and public spaces, in particular for women and children, older persons and persons with disabilities	11.7.1 Average share of the built-up area of cities that is open space for public use for all, by sex, age and persons with disabilities
		11.7.2 Proportion of persons victim of physical or sexual harassment, by sex, age, disability status and place of occurrence, in the previous 12 months
	11.a Support positive economic, social and environmental links between urban, peri-urban and rural areas by strengthening national and regional development planning	11.a.1 Number of countries that have national urban policies or regional development plans that (a) respond to population dynamics; (b) ensure balanced territorial development; and (c) increase local fiscal space
	11.b By 2020, substantially increase the number of cities and human settlements adopting and implementing integrated policies and plans towards inclusion, resource efficiency, mitigation and adaptation to climate change, resilience to disasters, and develop and implement, in line with the Sendai Framework for Disaster Risk Reduction 2015–2030, holistic disaster risk management at all levels	11.b.1 Number of countries that adopt and implement national disaster risk reduction strategies in line with the Sendai Framework for Disaster Risk Reduction 2015–2030
		11.b.2 Proportion of local governments that adopt and implement local disaster risk reduction strategies in line with national disaster risk reduction strategies
	11.c Support least developed countries, including through financial and technical assistance, in building sustainable and resilient buildings utilizing local materials	No suitable replacement indicator was proposed. The global statistical community is encouraged to work to develop an indicator that could be proposed for the 2025 comprehensive review. See E/CN.3/2020/2, paragraph 23.
	Goal 12. Ensure sustainable consumption and production patterns
	12.1 Implement the 10‑Year Framework of Programmes on Sustainable Consumption and Production Patterns, all countries taking action, with developed countries taking the lead, taking into account the development and capabilities of developing countries	12.1.1 Number of countries developing, adopting or implementing policy instruments aimed at supporting the shift to sustainable consumption and production
	12.2 By 2030, achieve the sustainable management and efficient use of natural resources	12.2.1 Material footprint, material footprint per capita, and material footprint per GDP
		12.2.2 Domestic material consumption, domestic material consumption per capita, and domestic material consumption per GDP
	12.3 By 2030, halve per capita global food waste at the retail and consumer levels and reduce food losses along production and supply chains, including post-harvest losses	12.3.1 (a) Food loss index and (b) food waste index
	12.4 By 2020, achieve the environmentally sound management of chemicals and all wastes throughout their life cycle, in accordance with agreed international frameworks, and significantly reduce their release to air, water and soil in order to minimize their adverse impacts on human health and the environment	12.4.1 Number of parties to international multilateral environmental agreements on hazardous waste, and other chemicals that meet their commitments and obligations in transmitting information as required by each relevant agreement
		12.4.2 (a) Hazardous waste generated per capita; and (b) proportion of hazardous waste treated, by type of treatment
	12.5 By 2030, substantially reduce waste generation through prevention, reduction, recycling and reuse	12.5.1 National recycling rate, tons of material recycled
	12.6 Encourage companies, especially large and transnational companies, to adopt sustainable practices and to integrate sustainability information into their reporting cycle	12.6.1 Number of companies publishing sustainability reports
	12.7 Promote public procurement practices that are sustainable, in accordance with national policies and priorities	12.7.1 Degree of sustainable public procurement policies and action plan implementation
	12.8 By 2030, ensure that people everywhere have the relevant information and awareness for sustainable development and lifestyles in harmony with nature	12.8.1 Extent to which (i) global citizenship education and (ii) education for sustainable development are mainstreamed in (a) national education policies; (b) curricula; (c) teacher education; and (d) student assessment
	12.a Support developing countries to strengthen their scientific and technological capacity to move towards more sustainable patterns of consumption and production	12.a.1 Installed renewable energy-generating capacity in developing countries (in watts per capita)
	12.b Develop and implement tools to monitor sustainable development impacts for sustainable tourism that creates jobs and promotes local culture and products	12.b.1 Implementation of standard accounting tools to monitor the economic and environmental aspects of tourism sustainability
	12.c Rationalize inefficient fossil-fuel subsidies that encourage wasteful consumption by removing market distortions, in accordance with national circumstances, including by restructuring taxation and phasing out those harmful subsidies, where they exist, to reflect their environmental impacts, taking fully into account the specific needs and conditions of developing countries and minimizing the…	12.c.1 Amount of fossil-fuel subsidies (production and consumption) per unit of GDP
	Goal 13. Take urgent action to combat climate change and its impacts3
	13.1 Strengthen resilience and adaptive capacity to climate-related hazards and natural disasters in all countries	13.1.1 Number of deaths, missing persons and directly affected persons attributed to disasters per 100,000 population
		13.1.2 Number of countries that adopt and implement national disaster risk reduction strategies in line with the Sendai Framework for Disaster Risk Reduction 2015–2030
		13.1.3 Proportion of local governments that adopt and implement local disaster risk reduction strategies in line with national disaster risk reduction strategies
	13.2 Integrate climate change measures into national policies, strategies and planning	13.2.1 Number of countries with nationally determined contributions, long-term strategies, national adaptation plans and adaptation communications, as reported to the secretariat of the United Nations Framework Convention on Climate Change
		13.2.2 Total greenhouse gas emissions per year
	13.3 Improve education, awareness-raising and human and institutional capacity on climate change mitigation, adaptation, impact reduction and early warning	13.3.1 Extent to which (i) global citizenship education and (ii) education for sustainable development are mainstreamed in (a) national education policies; (b) curricula; (c) teacher education; and (d) student assessment
	13.a Implement the commitment undertaken by developed-country parties to the United Nations Framework Convention on Climate Change to a goal of mobilizing jointly $100 billion annually by 2020 from all sources to address the needs of developing countries in the context of meaningful mitigation actions and transparency on implementation and fully operationalize the Green Climate Fund through its c…	13.a.1 Amounts provided and mobilized in United States dollars per year in relation to the continued existing collective mobilization goal of the $100 billion commitment through to 2025
	13.b Promote mechanisms for raising capacity for effective climate change-related planning and management in least developed countries and small island developing States, including focusing on women, youth and local and marginalized communities	13.b.1 Number of least developed countries and small island developing States with nationally determined contributions, long-term strategies, national adaptation plans and adaptation communications, as reported to the secretariat of the United Nations Framework Convention on Climate Change
	Goal 14. Conserve and sustainably use the oceans, seas and marine resources for sustainable development
	14.1 By 2025, prevent and significantly reduce marine pollution of all kinds, in particular from land-based activities, including marine debris and nutrient pollution	14.1.1 (a) Index of coastal eutrophication; and (b) plastic debris density
	14.2 By 2020, sustainably manage and protect marine and coastal ecosystems to avoid significant adverse impacts, including by strengthening their resilience, and take action for their restoration in order to achieve healthy and productive oceans	14.2.1 Number of countries using ecosystem-based approaches to managing marine areas
	14.3 Minimize and address the impacts of ocean acidification, including through enhanced scientific cooperation at all levels	14.3.1 Average marine acidity (pH) measured at agreed suite of representative sampling stations
	14.4 By 2020, effectively regulate harvesting and end overfishing, illegal, unreported and unregulated fishing and destructive fishing practices and implement science-based management plans, in order to restore fish stocks in the shortest time feasible, at least to levels that can produce maximum sustainable yield as determined by their biological characteristics	14.4.1 Proportion of fish stocks within biologically sustainable levels
	14.5 By 2020, conserve at least 10 per cent of coastal and marine areas, consistent with national and international law and based on the best available scientific information	14.5.1 Coverage of protected areas in relation to marine areas
	14.6 By 2020, prohibit certain forms of fisheries subsidies which contribute to overcapacity and overfishing, eliminate subsidies that contribute to illegal, unreported and unregulated fishing and refrain from introducing new such subsidies, recognizing that appropriate and effective special and differential treatment for developing and least developed countries should be an integral part of the …	14.6.1 Degree of implementation of international instruments aiming to combat illegal, unreported and unregulated fishing
	14.7 By 2030, increase the economic benefits to small island developing States and least developed countries from the sustainable use of marine resources, including through sustainable management of fisheries, aquaculture and tourism	14.7.1 Sustainable fisheries as a proportion of GDP in small island developing States, least developed countries and all countries
	14.a Increase scientific knowledge, develop research capacity and transfer marine technology, taking into account the Intergovernmental Oceanographic Commission Criteria and Guidelines on the Transfer of Marine Technology, in order to improve ocean health and to enhance the contribution of marine biodiversity to the development of developing countries, in particular small island developing States…	14.a.1 Proportion of total research budget allocated to research in the field of marine technology
	14.b Provide access for small-scale artisanal fishers to marine resources and markets	14.b.1 Degree of application of a legal/regulatory/ policy/institutional framework which recognizes and protects access rights for small-scale fisheries
	14.c Enhance the conservation and sustainable use of oceans and their resources by implementing international law as reflected in the United Nations Convention on the Law of the Sea, which provides the legal framework for the conservation and sustainable use of oceans and their resources, as recalled in paragraph 158 of “The future we want”	14.c.1 Number of countries making progress in ratifying, accepting and implementing through legal, policy and institutional frameworks, ocean-related instruments that implement international law, as reflected in the United Nations Convention on the Law of the Sea, for the conservation and sustainable use of the oceans and their resources
	Goal 15. Protect, restore and promote sustainable use of terrestrial ecosystems, sustainably manage forests, combat desertification, and halt and reverse land degradation and halt biodiversity loss
	15.1 By 2020, ensure the conservation, restoration and sustainable use of terrestrial and inland freshwater ecosystems and their services, in particular forests, wetlands, mountains and drylands, in line with obligations under international agreements	15.1.1 Forest area as a proportion of total land area
		15.1.2 Proportion of important sites for terrestrial and freshwater biodiversity that are covered by protected areas, by ecosystem type
	15.2 By 2020, promote the implementation of sustainable management of all types of forests, halt deforestation, restore degraded forests and substantially increase afforestation and reforestation globally	15.2.1 Progress towards sustainable forest management
	15.3 By 2030, combat desertification, restore degraded land and soil, including land affected by desertification, drought and floods, and strive to achieve a land degradation-neutral world	15.3.1 Proportion of land that is degraded over total land area
	15.4 By 2030, ensure the conservation of mountain ecosystems, including their biodiversity, in order to enhance their capacity to provide benefits that are essential for sustainable development	15.4.1 Coverage by protected areas of important sites for mountain biodiversity
		15.4.2 Mountain Green Cover Index
	15.5 Take urgent and significant action to reduce the degradation of natural habitats, halt the loss of biodiversity and, by 2020, protect and prevent the extinction of threatened species	15.5.1 Red List Index
	15.6 Promote fair and equitable sharing of the benefits arising from the utilization of genetic resources and promote appropriate access to such resources, as internationally agreed	15.6.1 Number of countries that have adopted legislative, administrative and policy frameworks to ensure fair and equitable sharing of benefits
	15.7 Take urgent action to end poaching and trafficking of protected species of flora and fauna and address both demand and supply of illegal wildlife products	15.7.1 Proportion of traded wildlife that was poached or illicitly trafficked
	15.8 By 2020, introduce measures to prevent the introduction and significantly reduce the impact of invasive alien species on land and water ecosystems and control or eradicate the priority species	15.8.1 Proportion of countries adopting relevant national legislation and adequately resourcing the prevention or control of invasive alien species
	15.9 By 2020, integrate ecosystem and biodiversity values into national and local planning, development processes, poverty reduction strategies and accounts	15.9.1 (a) Number of countries that have established national targets in accordance with or similar to Aichi Biodiversity Target 2 of the Strategic Plan for Biodiversity 2011–2020 in their national biodiversity strategy and action plans and the progress reported towards these targets; and (b) integration of biodiversity into national accounting and reporting systems, defined as implementation of …
	15.a Mobilize and significantly increase financial resources from all sources to conserve and sustainably use biodiversity and ecosystems	15.a.1 (a) Official development assistance on conservation and sustainable use of biodiversity; and (b) revenue generated and finance mobilized from biodiversity-relevant economic instruments
	15.b Mobilize significant resources from all sources and at all levels to finance sustainable forest management and provide adequate incentives to developing countries to advance such management, including for conservation and reforestation	15.b.1 (a) Official development assistance on conservation and sustainable use of biodiversity; and (b) revenue generated and finance mobilized from biodiversity-relevant economic instruments
	15.c Enhance global support for efforts to combat poaching and trafficking of protected species, including by increasing the capacity of local communities to pursue sustainable livelihood opportunities	15.c.1 Proportion of traded wildlife that was poached or illicitly trafficked
	Goal 16. Promote peaceful and inclusive societies for sustainable development, provide access to justice for all and build effective, accountable and inclusive institutions at all levels
	16.1 Significantly reduce all forms of violence and related death rates everywhere	16.1.1 Number of victims of intentional homicide per 100,000 population, by sex and age
		16.1.2 Conflict-related deaths per 100,000 population, by sex, age and cause
		16.1.3 Proportion of population subjected to (a) physical violence, (b) psychological violence and (c) sexual violence in the previous 12 months
		16.1.4 Proportion of population that feel safe walking alone around the area they live after dark
	16.2 End abuse, exploitation, trafficking and all forms of violence against and torture of children	16.2.1 Proportion of children aged 1–17 years who experienced any physical punishment and/or psychological aggression by caregivers in the past month
		16.2.2 Number of victims of human trafficking per 100,000 population, by sex, age and form of exploitation
		16.2.3 Proportion of young women and men aged 18–29 years who experienced sexual violence by age 18
	16.3 Promote the rule of law at the national and international levels and ensure equal access to justice for all	16.3.1 Proportion of victims of violence in the previous 12 months who reported their victimization to competent authorities or other officially recognized conflict resolution mechanisms
		16.3.2 Unsentenced detainees as a proportion of overall prison population
		16.3.3 Proportion of the population who have experienced a dispute in the past two years and who accessed a formal or informal dispute resolution mechanism, by type of mechanism
	16.4 By 2030, significantly reduce illicit financial and arms flows, strengthen the recovery and return of stolen assets and combat all forms of organized crime	16.4.1 Total value of inward and outward illicit financial flows (in current United States dollars)
		16.4.2 Proportion of seized, found or surrendered arms whose illicit origin or context has been traced or established by a competent authority in line with international instruments
	16.5 Substantially reduce corruption and bribery in all their forms	16.5.1 Proportion of persons who had at least one contact with a public official and who paid a bribe to a public official, or were asked for a bribe by those public officials, during the previous 12 months
		16.5.2 Proportion of businesses that had at least one contact with a public official and that paid a bribe to a public official, or were asked for a bribe by those public officials during the previous 12 months
	16.6 Develop effective, accountable and transparent institutions at all levels	16.6.1 Primary government expenditures as a proportion of original approved budget, by sector (or by budget codes or similar)
		16.6.2 Proportion of population satisfied with their last experience of public services
	16.7 Ensure responsive, inclusive, participatory and representative decision-making at all levels	16.7.1 Proportions of positions in national and local institutions, including (a) the legislatures; (b) the public service; and (c) the judiciary, compared to national distributions, by sex, age, persons with disabilities and population groups
		16.7.2 Proportion of population who believe decision-making is inclusive and responsive, by sex, age, disability and population group
	16.8 Broaden and strengthen the participation of developing countries in the institutions of global governance	16.8.1 Proportion of members and voting rights of developing countries in international organizations
	16.9 By 2030, provide legal identity for all, including birth registration	16.9.1 Proportion of children under 5 years of age whose births have been registered with a civil authority, by age
	16.10 Ensure public access to information and protect fundamental freedoms, in accordance with national legislation and international agreements	16.10.1 Number of verified cases of killing, kidnapping, enforced disappearance, arbitrary detention and torture of journalists, associated media personnel, trade unionists and human rights advocates in the previous 12 months
		16.10.2 Number of countries that adopt and implement constitutional, statutory and/or policy guarantees for public access to information
	16.a Strengthen relevant national institutions, including through international cooperation, for building capacity at all levels, in particular in developing countries, to prevent violence and combat terrorism and crime	16.a.1 Existence of independent national human rights institutions in compliance with the Paris Principles
	16.b Promote and enforce non-discriminatory laws and policies for sustainable development	16.b.1 Proportion of population reporting having personally felt discriminated against or harassed in the previous 12 months on the basis of a ground of discrimination prohibited under international human rights law
	Goal 17. Strengthen the means of implementation and revitalize the Global Partnership for Sustainable Development
	Finance
	17.1 Strengthen domestic resource mobilization, including through international support to developing countries, to improve domestic capacity for tax and other revenue collection	17.1.1 Total government revenue as a proportion of GDP, by source
		17.1.2 Proportion of domestic budget funded by domestic taxes
	17.2 Developed countries to implement fully their official development assistance commitments, including the commitment by many developed countries to achieve the target of 0.7 per cent of gross national income for official development assistance (ODA/GNI) to developing countries and 0.15 to 0.20 per cent of ODA/GNI to least developed countries; ODA providers are encouraged to consider setting a …	17.2.1 Net official development assistance, total and to least developed countries, as a proportion of the Organization for Economic Cooperation and Development (OECD) Development Assistance Committee donors’ gross national income (GNI)
	17.3 Mobilize additional financial resources for developing countries from multiple sources	17.3.1 Additional financial resources mobilized for developing countries from multiple sources
		17.3.2 Volume of remittances (in United States dollars) as a proportion of total GDP
	17.4 Assist developing countries in attaining long-term debt sustainability through coordinated policies aimed at fostering debt financing, debt relief and debt restructuring, as appropriate, and address the external debt of highly indebted poor countries to reduce debt distress	17.4.1 Debt service as a proportion of exports of goods and services
	17.5 Adopt and implement investment promotion regimes for least developed countries	17.5.1 Number of countries that adopt and implement investment promotion regimes for developing countries, including the least developed countries
	Technology
	17.6 Enhance North-South, South-South and triangular regional and international cooperation on and access to science, technology and innovation and enhance knowledge-sharing on mutually agreed terms, including through improved coordination among existing mechanisms, in particular at the United Nations level, and through a global technology facilitation mechanism	17.6.1 Fixed Internet broadband subscriptions per 100 inhabitants, by speed5
	17.7 Promote the development, transfer, dissemination and diffusion of environmentally sound technologies to developing countries on favourable terms, including on concessional and preferential terms, as mutually agreed	17.7.1 Total amount of funding for developing countries to promote the development, transfer, dissemination and diffusion of environmentally sound technologies
	17.8 Fully operationalize the technology bank and science, technology and innovation capacity-building mechanism for least developed countries by 2017 and enhance the use of enabling technology, in particular information and communications technology	17.8.1 Proportion of individuals using the Internet
	Capacity-building
	17.9 Enhance international support for implementing effective and targeted capacity-building in developing countries to support national plans to implement all the Sustainable Development Goals, including through North-South, South-South and triangular cooperation	17.9.1 Dollar value of financial and technical assistance (including through North-South, South‑South and triangular cooperation) committed to developing countries
	Trade
	17.10 Promote a universal, rules-based, open, non‑discriminatory and equitable multilateral trading system under the World Trade Organization, including through the conclusion of negotiations under its Doha Development Agenda	17.10.1 Worldwide weighted tariff-average
	17.11 Significantly increase the exports of developing countries, in particular with a view to doubling the least developed countries’ share of global exports by 2020	17.11.1 Developing countries’ and least developed countries’ share of global exports
	17.12 Realize timely implementation of duty-free and quota-free market access on a lasting basis for all least developed countries, consistent with World Trade Organization decisions, including by ensuring that preferential rules of origin applicable to imports from least developed countries are transparent and simple, and contribute to facilitating market access	17.12.1 Weighted average tariffs faced by developing countries, least developed countries and small island developing States
	Systemic issues
	Policy and institutional coherence
	17.13 Enhance global macroeconomic stability, including through policy coordination and policy coherence	17.13.1 Macroeconomic Dashboard
	17.14 Enhance policy coherence for sustainable development	17.14.1 Number of countries with mechanisms in place to enhance policy coherence of sustainable development
	17.15 Respect each country’s policy space and leadership to establish and implement policies for poverty eradication and sustainable development	17.15.1 Extent of use of country-owned results frameworks and planning tools by providers of development cooperation
	Multi-stakeholder partnerships
	17.16 Enhance the Global Partnership for Sustainable Development, complemented by multi-stakeholder partnerships that mobilize and share knowledge, expertise, technology and financial resources, to support the achievement of the Sustainable Development Goals in all countries, in particular developing countries	17.16.1 Number of countries reporting progress in multi-stakeholder development effectiveness monitoring frameworks that support the achievement of the sustainable development goals
	17.17 Encourage and promote effective public, public-private and civil society partnerships, building on the experience and resourcing strategies of partnerships	17.17.1 Amount in United States dollars committed to public-private partnerships for infrastructure
	Data, monitoring and accountability
	17.18 By 2020, enhance capacity-building support to developing countries, including for least developed countries and small island developing States, to increase significantly the availability of high-quality, timely and reliable data disaggregated by income, gender, age, race, ethnicity, migratory status, disability, geographic location and other characteristics relevant in national contexts	17.18.1 Statistical capacity indicator for Sustainable Development Goal monitoring
		17.18.2 Number of countries that have national statistical legislation that complies with the Fundamental Principles of Official Statistics
		17.18.3 Number of countries with a national statistical plan that is fully funded and under implementation, by source of funding
	17.19 By 2030, build on existing initiatives to develop measurements of progress on sustainable development that complement gross domestic product, and support statistical capacity-building in developing countries	17.19.1 Dollar value of all resources made available to strengthen statistical capacity in developing countries
		17.19.2 Proportion of countries that (a) have conducted at least one population and housing census in the last 10 years; and (b) have achieved 100 per cent birth registration and 80 per cent death registration
	* As contained in the Annex of the resolution adopted by the General Assembly on 6 July 2017, Work of the Statistical Commission pertaining to the 2030 Agenda for Sustainable Development (A/RES/71/313), annual refinements contained in E/CN.3/2018/2 (Annex II), E/CN.3/2019/2 (Annex II), 2020 Comprehensive Review changes (Annex II) and annual refinements (Annex III) contained in E/CN.3/2020/2, annu…
	† Indicator codes were developed by UNSD for data transfer, tracking and other statistical purposes.
	1 Resolution 68/261.
	2 The Gini Coefficient will be reported as a second series in the database, as it is a component of this indicator.
	3 Acknowledging that the United Nations Framework Convention on Climate Change is the primary international, intergovernmental forum for negotiating the global response to climate change.
	4 Taking into account ongoing World Trade Organization negotiations, the Doha Development Agenda and the Hong Kong ministerial mandate.
	5 The current indicator 17.6.1 was previously listed as 17.6.2.

## Sheet: Schmidt-Traub references
REFERENCES FOR SUPPLEMENTAL MATERIAL (see paper for full list of references)
Bazilian, M., Nussbaumer, P., Haites, E., Levi, M., Howells, M., & Yumkella, K.K. (2010). Understanding the Scale of Investment for Universal Energy Access. Geopolitics of Energy, 32(10-11): 21-42.
Bhattacharya, A., Romani, M., & Stern, N. 2012. Infrastructure for development: meeting the challenge. London: Centre for Climate Change Economics and Policy.
Beaglehole, R., Ebrahim, S., Reddy, S., Voute, J., & Leeder, S. 2008. Prevention of chronic diseases: a call to action. The Lancet, 370(9605): 2152-2157.
CBD. 2012a. Resourcing the Aichi Biodiversity Targets: A first assessment of the resources required for implementing the strategic plan for biodiversity 2011-2020. Report of the High-level Panel on Global Assessment of Resources for Implementing the Strategic Plan for Biodiversity 2011-2020. Montreal: Convention on Biological Diversity.
CBD. 2012b. Full Assessment of the Amount of Funds Needed for the Implementation of the Convention for the Sixth Replenishment Period of the Trust Fund of the Global Environment Facility. An Assessment by the CBD Expert Team Members. Hyderabad: Convention on Biological Diversity. Montreal: Convention on Biological Diversity.
Chatham House. 2014. Shared Responsibilities for Health A Coherent Global Framework for Health Financing. Final Report of the Centre on Global Health Security Working Group on Health Financing. London: Chatham House.
Espey, J., Swanson, E., Badiee, S., Christensen, Z., Fischer, A., Levy, M., Yetman, G., de Sherbinin, A., Chen, R., Qiu, Y., Greenwell, G., Klein, T., Jutting, J., Jerven, M., Cameron, G., Aguilar Rivera, A.M., Arias, V.C., Lantei Mills, S. and Motivans, A. 2015. Data for Development: A Needs Assessment for SDG Monitoring and Statistical Capacity Development. Paris and New York: Sustainable Devel…
FAO, IFAD & WFP. 2015. Achieving Zero Hunger: The Critical Role of Investments in Social Protection and Agriculture. Rome: Food and Agriculture Organization, International Fund for Agricultural Development and World Food Programme.
FAO. 2003. Anti-Hunger Programme: A twin-track approach to hunger reduction: priorities for national and international action. Rome: Food and Agriculture Organization.
Fay, M. & Yepes, T. 2003. Investing in Infrastructure: What is needed from 2000 to 2010? Washington D.C.: World Bank.
Fay, M., Toman, M., Benitez, D., & Csordas, S. 2011. Infrastructure and sustainable development. Postcrisis Growth and Development: A Development Agenda for the G, 20: 329-382.
Foster, V. and Briceño-Garmendia, C. (Eds.). 2010. Africa’s Infrastructure: A Time for Transformation. Washington, D.C.: World Bank.
GEA. 2012. Global Energy Assessment: Toward a Sustainable Future. Global Energy Assessment. Laxenburg, Austria: International Institute for Applied Systems Analysis.
Greenhill, R., Hoy, C., Carter, P. & Manuel, M. 2015. Financing the future: How international public finance should fund a global social compact to eradicate poverty. London: Overseas Development Institute.
Hutton, G. 2012. Global Costs and Benefits of Drinking-Water Supply and Sanitation Interventions to Reach the MDG Target and Universal Coverage. Report No. WHO/HSE/WSH/12.01. Geneva: World Health Organization.
Hutton, G. 2015. Benefits and Costs of the Water Sanitation and Hygiene Targets for the Post-2015 Development Agenda. Post-2015 Consensus: Water and Sanitation Assessment. Lowell, MA: Copenhagen Consensus Center.
IEA. 2011. World Energy Outlook 2011. Paris: International Energy Agency.
ILO. 2005. Can low income countries afford basic social protection? First results of a modelling exercise. Issues in Social Protection Discussion Paper 13. Geneva: International Labor Organization.
ILO. 2008. Can low-income countries afford basic social security? Social Security Policy Briefings Paper 3. Geneva: International Labor Organization.
Jamison, D.T., Summers, L.H., Alleyne, G., Arrow, K.J., Berkley, S., Banagwaho, A., Bustrea, F., Evans, D., Feachem, R.G.A., Frenk, J., Ghosh, G., Goldie, S.J., Gua, Y., Gupta, S., Horton, R., Kruk, M.E., Mahmoud, A., Mohohlo, L.K., Ncube, M., Pablos-Mendez, A., Reddy K.S., Saxenian, H., Soucat, A., Ulltveit-Moe, K.H., Yamey, G. 2013. Global health 2035: a world converging within a generation. Th…
Manuel, M., & Hoy, C. 2015. Background Paper: Social sector spending and aid allocation to achieve the SDGs. ODI Working Paper 416. London: Overseas Development Institute.
McIntyre, D. & Meheus, F. 2014. Fiscal Space for Domestic Funding of Health and Other Social Services. Centre on Global Health Security Working Group Papers. Working Group on Financing Paper 5. London: Chatham House.
McKinsey. 2013. Infrastructure productivity: How to save $1 trillion a year. McKinsey Global Institute.
MDB Committee on Development Effectiveness (2011). Supporting Infrastructure in Developing Countries. Paper submitted to the G20, 30 November 2011.
Mizunoya, S., Behrendt, C., Pal, K., & Léger, F. 2006. Costing of basic social protection benefits for selected Asian countries: First results of a modelling exercise. Issues in Social Protection, Discussion Paper 17. Geneva: International Labour Organization.
NCEC. 2014. Technical Note: Infrastructure investment needs of a low-carbon scenario. Washington, D.C.: New Climate Economy Commission.
OECD. 2006. Infrastructure to 2030: Telecom, Land Transport, Water and Electricity. OECD Publishing. Paris: Organization for Economic Cooperation and Development.
OECD. 2012. Strategic Transport Infrastructure Needs to 2030. OECD Publishing. Paris: Organization for Economic Cooperation and Development.
OWG. 2014. Outcome Document. New York: United Nations Open Working Group on the Sustainable Development Goals.
Pachauri, S., van Ruijven, B.J., Nagai, Y., Riahi, K., van Vuuren, D.P., Brew-Hammond, A., & Nakicenovic, N. 2013. Pathways to achieve universal household access to modern energy by 2030. Environmental Research Letters, 8(2), 024015.
Rosegrant, M. W., Magalhaes, E., Valmonte-Santos, R. A., & Mason-D'Croz, D. 2015. Food Security and Nutrition Assessment Paper: Benefits and Costs of the Food Security and Nutrition Targets for the Post-2015 Development Agenda. Lowell, MA: Copenhagen Consensus Center.
Schmidhuber, J, Bruinsma, J., & Boedeker, G. 2009. Capital Requirements for Agriculture in Developing Countries to 2050. Rome: Food and Agriculture Organization.
Schmidhuber, J., & Bruinsma, J. 2011. Investing towards a World Free of Hunger: Lowering Vulnerability and Enhancing Resilience. In Prakash, A. (ed.) Safeguarding Food Security in Volatile Global Markets. Rome: Food and Agriculture Organization.
Schmidt-Traub, G. 2015. Investment Needs to Achieve the Sustainable Development Goals: Understanding the Billions and Trillions. SDSN Working Paper. Paris and New York: Sustainable Development Solutions Network.
SDSN. 2015. Key Elements of a Successful Addis Ababa Accord on Financing for Sustainable Development. Paris and New York: Sustainable Development Solutions Network.
Stern, N. 2007. Stern Review: The Economics of Climate Change. London: HM treasury.
UNCTAD. 2014. World Investment Report 2014. Investing in the SDGs: An Action Plan. Geneva: United Nations Conference on Trade and Development.
UNESCO. 2015a. Education for All Global Monitoring Report: Education for All 2000-2015 – Achievements and Challenges. Paris: United Nations Educational, Scientific and Cultural Organization.
UNESCO. 2015b. Education for All Global Monitoring Report: The Cost of Reaching New Targets by 2030. UNESCO Policy Paper 18. July 2015 Update. Paris: United Nations Educational, Scientific and Cultural Organization.
UNFCCC. 2007. Investment and Financial Flows to Address Climate Change. Bonn, Germany: United Nations Framework Convention on Climate Change.
WEF & PwC. 2013. Strategic Infrastructure Steps to Prioritize and Deliver Infrastructure Effectively and Efficiently.
WHO. 2010. Constraints to Scaling Up the Health Millennium Development Goals: Costing and Financial Gap Analysis. Geneva: World Health Organization.
WHO. 2011. Scaling up action against noncommunicable diseases: How much will it cost? Geneva: World Health Organization.
World Bank. 2010. Economics of Adaptation to Climate Change: Synthesis Report. Washington, D.C.: International Bank for Reconstruction and Development, and World Bank.
World Bank. 2013. Global Development Horizons – Capital for the Future: Saving and Investment in an Interdependent World. Washington, D.C.: World Bank
